# Supplementary material for: Single-Grain Quartz OSL Characteristics: Testing for Correlations within and between Sites in Asia, Europe and Africa
Source: Methods Protoc. 2019 Dec 26;3(1):2. doi: 10.3390/mps3010002 (PMC7189676; doi:10.3390/mps3010002)
Supplement: Supplementary file 1 [file mps-03-00002-s001.pdf]

**Table S1.** The single-aliquot regenerative-dose (SAR) procedure for single grain.

| Step | Treatment                                                  | Observed |
|------|------------------------------------------------------------|----------|
| 1    | Give dose, $D_i$                                           |          |
| 2    | Preheat (240°C for 10 s)                                   |          |
| 3    | Single-grain stimulation with green laser for 2 s at 125°C | $L_x$    |
| 4    | Give test dose, $D_t$ (10 Gy)                              |          |
| 5    | Cut-heat to 180°C                                          |          |
| 6    | Single-grain stimulation with green laser for 2 s at 125°C | $T_x$    |
| 7    | Blue LED bleach for 40 s at 280°C                          |          |
| 8    | Return to step 1                                           |          |

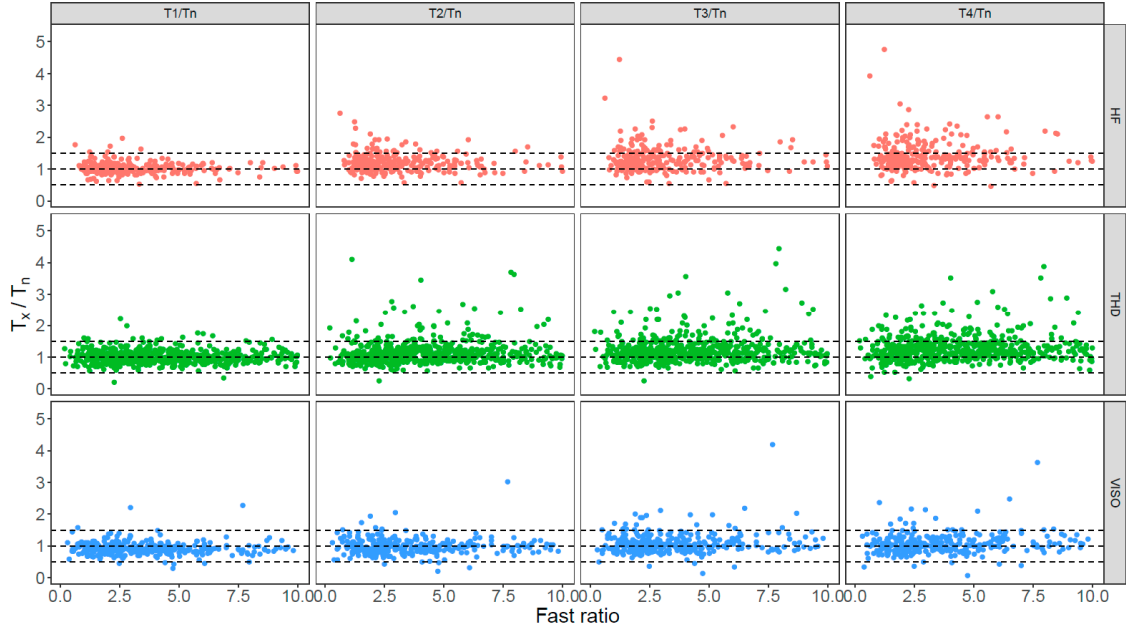

**Figure S1.** Ratios between test-dose signals ( $T_x$ ) of the 2<sup>nd</sup>–5<sup>th</sup> SAR cycles ( $T_1$ – $T_4$ ) and the first cycle ( $T_n$ ) plotted against fast ratio for grains from different sites (shown in different rows). The dashed horizontal lines represents values at 0.5, 1.0 and 1.5, respectively.

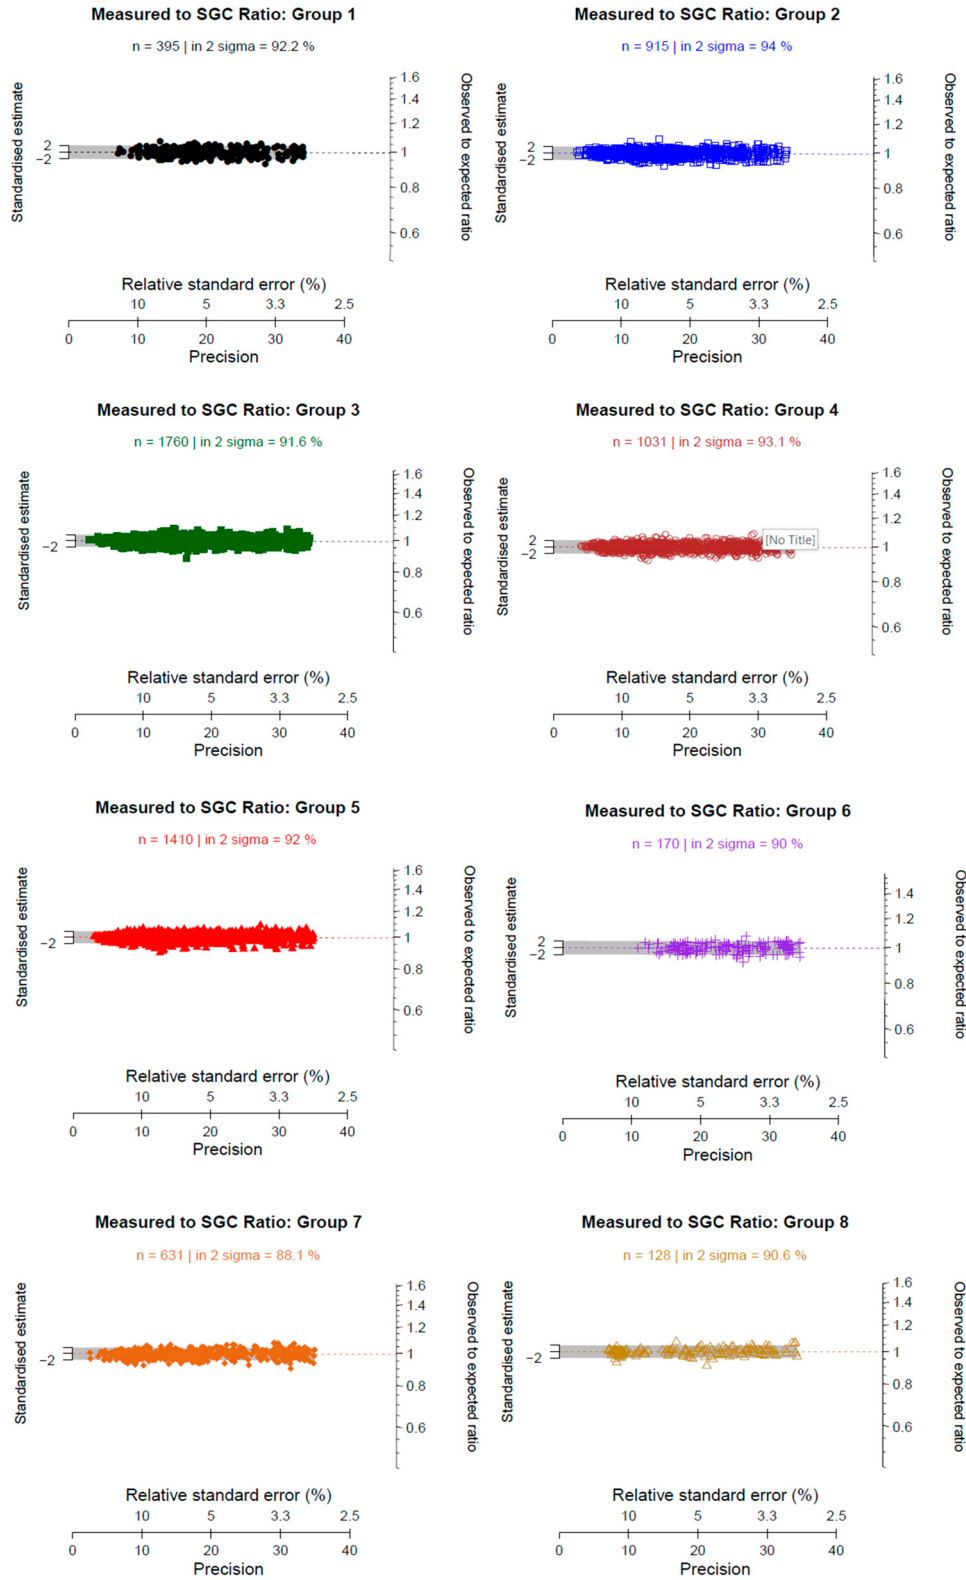

**Figure S2.** Radial plots showing the ratios between the LS-normalised  $L_x/T_x$  values and the expected values based on the best-fit SGC shown in Fig. 6a; the shaded band captures the  $2\sigma$  range from unity. The total number of grains ( $n$ ) and percentage falling inside the  $2\sigma$  band are shown at the top of the plot for each Group.
